# Supplementary material for: The Triple Mechanisms of Atenolol Adsorption on Ca-Montmorillonite: Implication in Pharmaceutical Wastewater Treatment
Source: MDPI journal article supplement (doi:10.3390/ma12182858), 2019-09-05
Supplement: s1 [file s1]

Supplementary Materials

# The Triple Mechanisms of Atenolol Adsorption on Ca-Montmorillonite: Implication in Pharmaceutical Wastewater Treatment

Po-Hsiang Chang <sup>1</sup>, Wei-Teh Jiang <sup>2,\*</sup>, Binoy Sarkar <sup>3</sup>, Wendong Wang <sup>1,\*</sup> and Zhaohui Li <sup>4,\*</sup>

<sup>1</sup> School of Human Settlements and Civil Engineering, Xi'an Jiaotong University, 28 Xianning West Road, Xi'an 710049, China; tectonicion@xjtu.edu.cn

<sup>2</sup> Department of Earth Sciences, National Cheng Kung University, 1 University Road, Tainan 70101, Taiwan;

<sup>3</sup> Department of Animal and Plant Sciences, The University of Sheffield, Sheffield S10 2TN, UK

<sup>4</sup> Department of Geosciences, University of Wisconsin – Parkside, 900 Wood Road, Kenosha, WI 53144, USA

\* Correspondence: atwtj@mail.ncku.edu.tw (W.-T.J.); wdwang@xjtu.edu.cn (W.W.); li@uwp.edu (Z.L.); Tel.: 1-262-595-2487 (Z.L.)

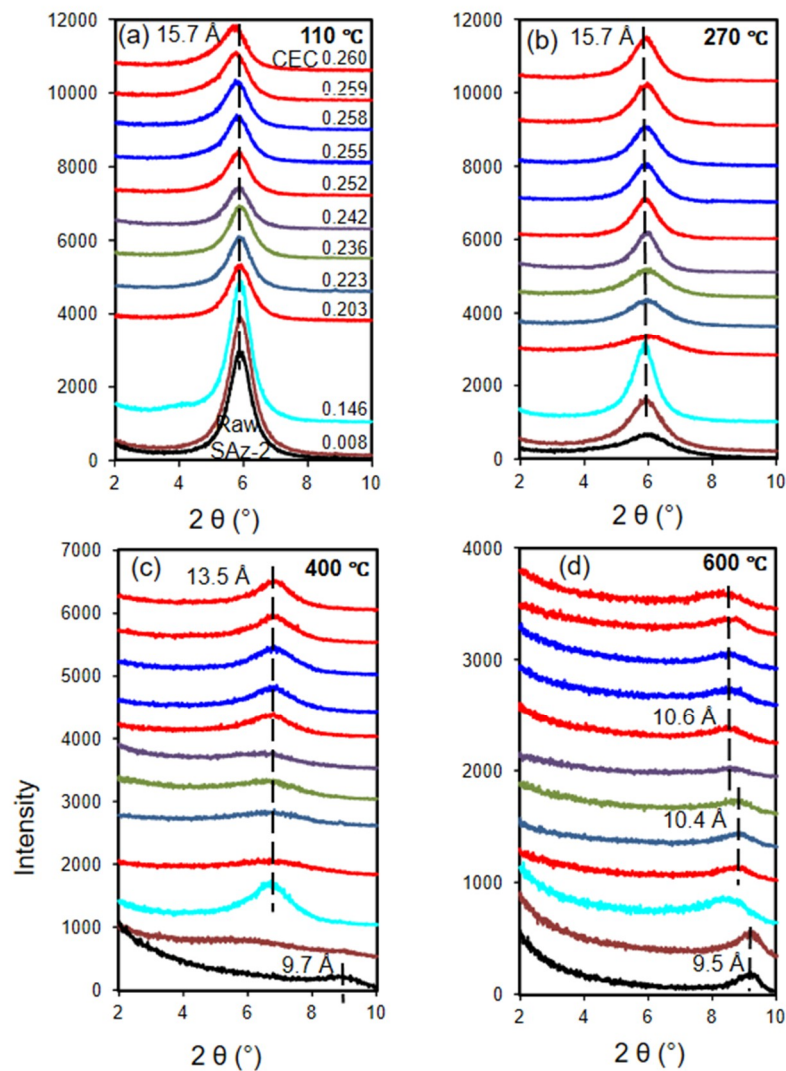

**Figure S1.** XRD patterns of raw SAz-2 and SAz-2 with different adsorbed amounts without recrystallization from isotherm adsorption for AT under four different heating temperatures (a–d).

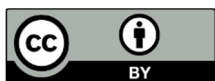

© 2019 by the authors. Licensee MDPI, Basel, Switzerland. This article is an open access article distributed under the terms and conditions of the Creative Commons Attribution (CC BY) license (<http://creativecommons.org/licenses/by/4.0/>).
